# Supplementary material for: Impacts of ocean acidification on intertidal benthic foraminiferal growth and calcification
Source: PLOS journal article supplement (doi:10.1371/journal.pone.0220046), 2019-08-21

S2 Fig

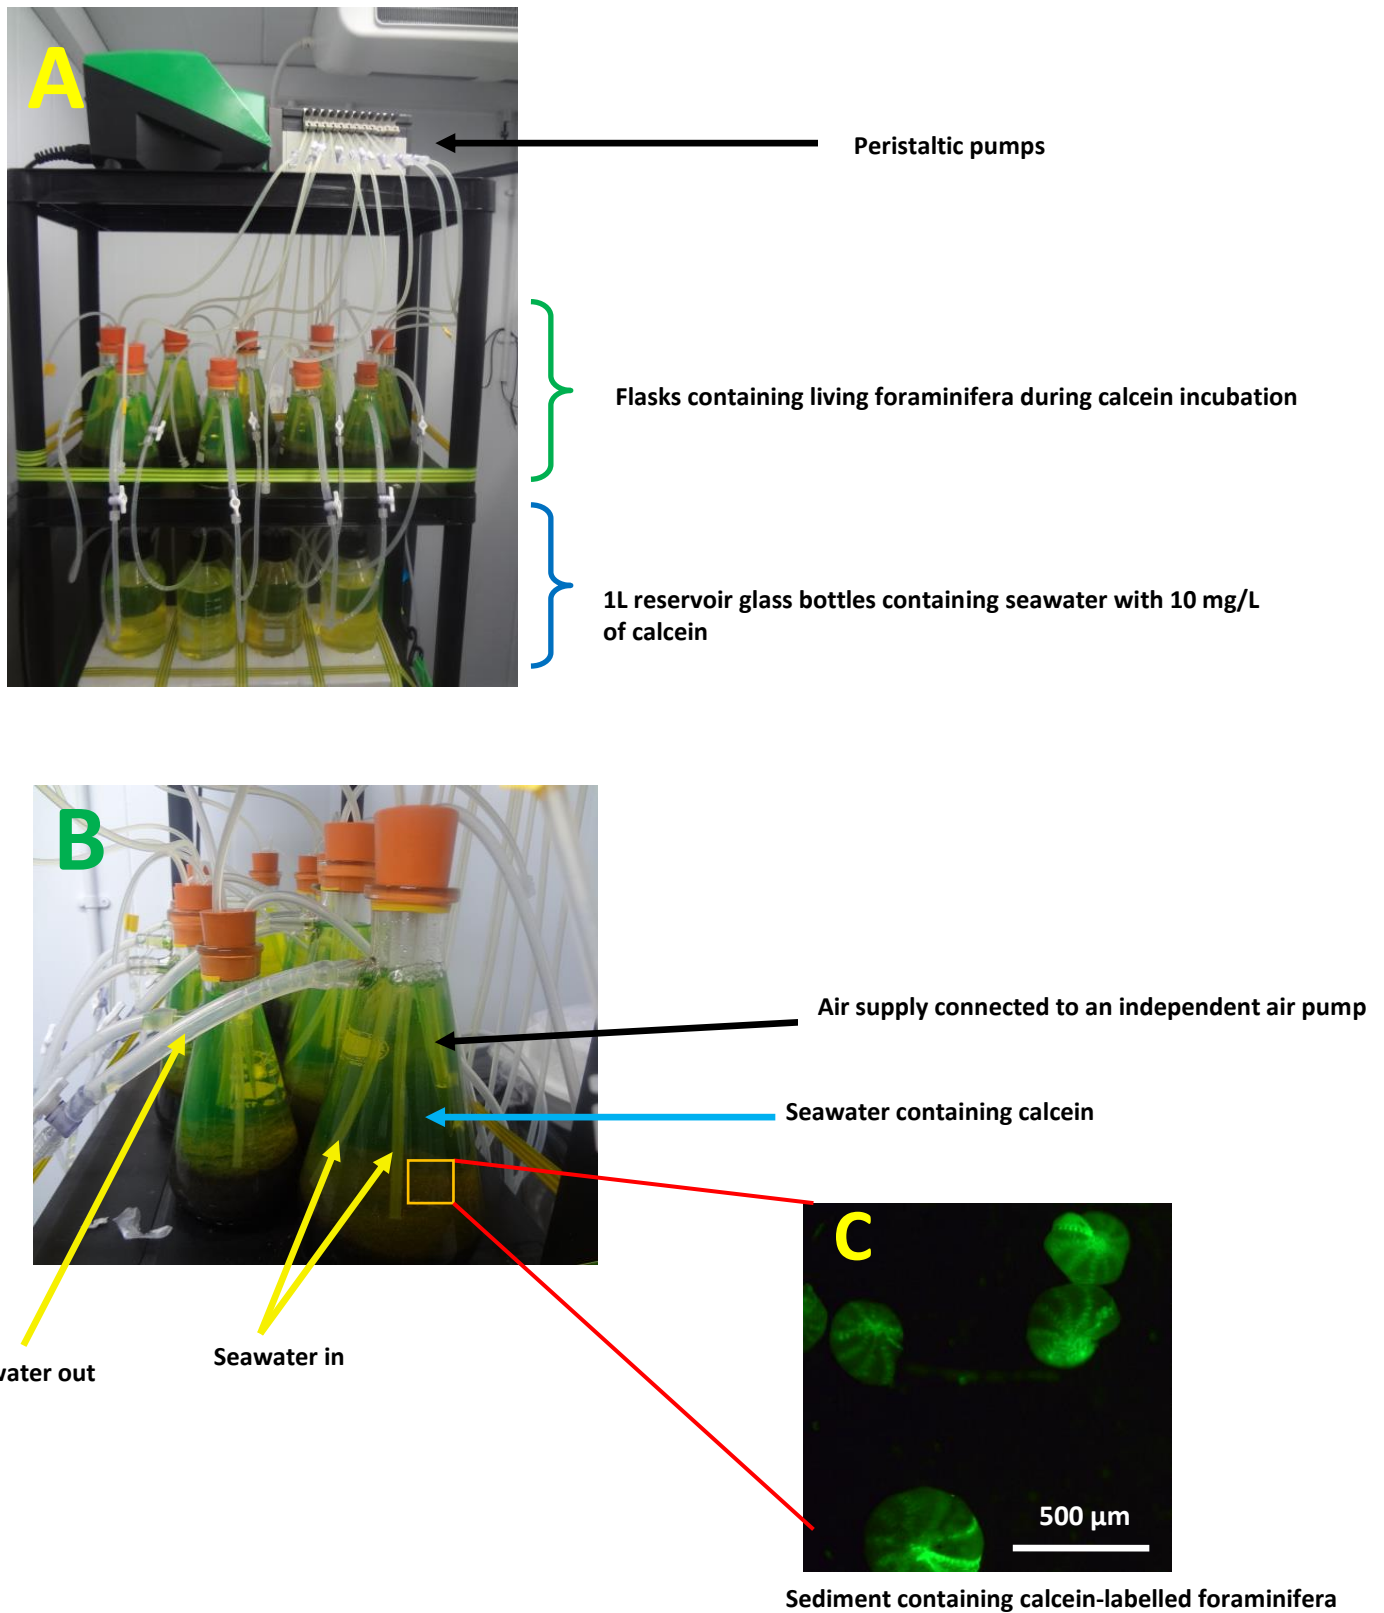

Supplement: S2 (10.1371/journal.pone.0220046.s002) [file journal.pone.0220046.s002]
